# Supplementary material for: Tailoring biobased polythiourethane crosslinking networks with flame-retardancy and remote ultrafast infrared “welding” performance
Source: Royal Society of Chemistry journal article supplement (doi:10.1039/d4ta05966b), 2024-01-01
Supplement: d4ta05966b1.pdf [file d4ta05966b1.pdf]

## Tailoring the Biobased Polythiourethane Crosslinking Networks with Flame-Retardancy and Remote Ultrafast Infrared “Welding” Performance

Ning Ding<sup>1#</sup>, Yi Yang<sup>1#</sup>, Wei Zhou<sup>1</sup>, Debora Puglia<sup>2</sup>, Pengwu Xu<sup>1</sup>, Deyu Niu<sup>1</sup>, Weijun Yang<sup>1\*</sup>, Piming Ma<sup>1\*</sup>

<sup>#</sup> equal contribution

1, The Key Laboratory of Synthetic and Biological Colloids, Ministry of Education, School of Chemical and Material Engineering, Jiangnan University, Wuxi 214122, China;

2, Civil and Environmental Engineering Department, Materials Engineering Center, Perugia University, UdR INSTM, Terni 05100, Italy

\*Email: [weijun.yang@jiangnan.edu.cn](mailto:weijun.yang@jiangnan.edu.cn), [p.ma@jiangnan.edu.cn](mailto:p.ma@jiangnan.edu.cn)

### Characterizations

**Fourier transform infrared (FT-IR).** FT-IR spectra were obtained on a Nicolet 6700 infrared spectrometer used to analyze the chemical structure of eugenol, PPDC, BEP, DODT, BEP-SH, and the crosslinked PTU in total reflection mode. The scanning range was 4000-500 cm<sup>-1</sup> and the number of scanning was 128 times.

**Nuclear Magnetic Resonance (NMR).** <sup>1</sup>H NMR and <sup>31</sup>P NMR spectra of BEP-SH were recorded on a 400 MHz AVANCE III HD spectrometer (Bruker, Switzerland) using CDCl<sub>3</sub> as the solvent and tetramethylsilane (TMS) as an internal standard.

**X-ray diffraction (XRD).** To investigate the inherent interactions of Ti<sub>3</sub>AlC<sub>2</sub> and F-MXene, X-ray diffraction patterns were recorded by AXS D8 diffractometer (Bruker, German) using Cu-K $\alpha$  radiation ( $\lambda = 1.5406 \text{ \AA}$ , 40 Kv, 20 mA) and 0.2 theta scan ranging from 5° to 65°.

**Scanning electron microscopy (SEM).** The microstructures of Ti<sub>3</sub>AlC<sub>2</sub>, M-MXene, F-MXene, and MXene-SH were investigated by SEM (S-4800, HITACHI, Japan). All samples were sputtered with a layer of gold before observation.

**Thermogravimetric analysis (TGA).** TGA was carried out on an 1100SF TA Instruments apparatus (Mettler-Toledo, Switzerland) under nitrogen at a 50 mL/min flow rate and a 20 °C/min heating ramp from 40 °C to 800 °C. The mass for each sample was around 5-10 mg.

**Dynamic mechanical analysis (DMA).** The evaluation of  $T_g$  temperatures, storage modulus, loss modulus, and  $\tan \delta$  for the crosslinked PTU was carried out on a TA

Instrument (TA Q800, USA) at a heating rate of 3 °C/min from -20 °C to 140 °C. Samples with dimensions of 30 mm×10 mm×2 mm were tested by using a film tensile clamp, frequency of 1 Hz, and amplitude of 10 μm.

**Differential scanning calorimetry (DSC).** The glass transition temperature ( $T_g$ ) of the crosslinked PTU (about 5-10 mg) was studied by DSC measurements (DSC-8000, PE Instrument, USA). The composites were heated from -40 °C to 120 °C at a 20 °C/min heating rate under a nitrogen flow.

**Tensile test.** The tensile test of standard dumbbell crosslinked PTU was performed by using a universal material testing machine (Instron 5967, USA), according to ASTM D638, at a crosshead rate of 50 mm/min. All samples were tested for at least 5 repetitions, and their average value for the mechanical parameters was calculated.

**Limiting oxygen index (LOI).** The LOI tests were carried out with a JF-3 oxygen index tester (Jiangning Analysis Instrument Company, China) according to ASTM D2863-97 standard, with sheet dimensions 100×10×3 mm<sup>3</sup>. The LOI measurement for each specimen was repeated five times.

**The vertical burning test (UL-94).** UL-94 vertical burning tests were carried out on a CZF-4 type vertical burning tester (Shangyuan Analysis Instrument Company, China) according to ASTM D3801-2010, with sheet dimensions of 130×13×3 mm<sup>3</sup>. The measurement for each specimen was repeated five times.

**Thermogravimetry-infrared (TG-IR).** The TG-FTIR (PE TGA4000, USA) was used to test the pyrolysis volatiles of B10T0-THDI, B10T0-TTI, and B8T2-TTI under N<sub>2</sub> atmosphere. The samples were heated from the 30 to 800 °C.

**Optical microscope.** The scratch changes on the surface of the sample were observed by an optical microscope, and a scratch of a certain width was scratched on the surface of the sample. The self-healing of surface scratches of crosslinked PTU B8T2-TTI and PTU/MXene composites under remote infrared light irradiation (light intensity was 2 W/cm<sup>2</sup>) was observed.

**Table S1** The formula of PTU network and PTU/MXene composites

| <b>Samples</b> | <b>BEP-SH (g)</b> | <b>TEMPIC (g)</b> | <b>THDI (g)</b> | <b>TTI (g)</b> | <b>MXene-SH (g)</b> |
|----------------|-------------------|-------------------|-----------------|----------------|---------------------|
| B10T0-THDI     | 10                | /                 | 4.13 g          | /              | /                   |
| B10T0-TTI      | 10                | /                 | /               | 3.006          | /                   |
| B9T1-TTI       | 10                | 1.1               | /               | 3.775          | /                   |
| B8T2-TTI       | 10                | 2.5               | /               | 4.754          | /                   |
| B8T2-TTI-0.25M | 10                | 2.5               | /               | 4.758          | 0.043               |
| B8T2-TTI-0.5M  | 10                | 2.5               | /               | 4.762          | 0.086               |

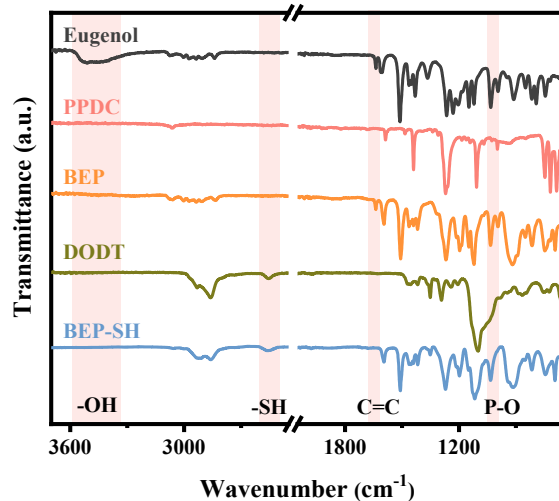

Figure S1 FT-IR of monomer BEP-SH

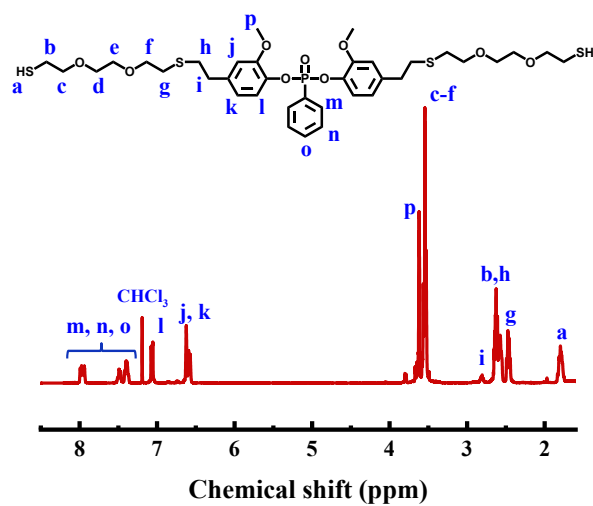

Figure S2 <sup>1</sup>H NMR of monomer BEP-SH

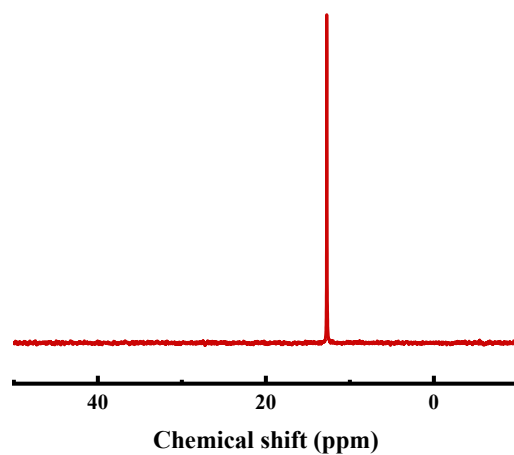

Figure S3 <sup>31</sup>P NMR of monomer BEP-SH

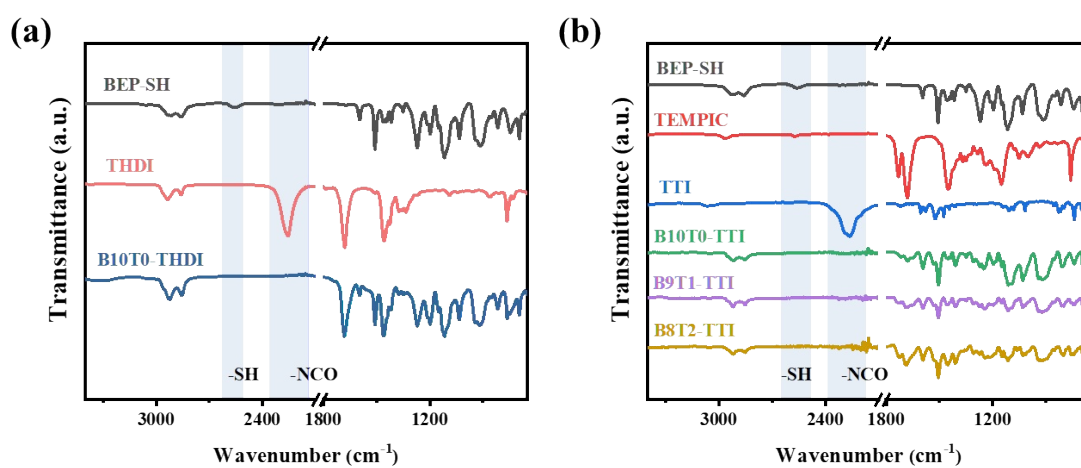

**Figure S4** The FTIR spectra of polythiourethanes before and after curing (a) B10T0-THDI, (b) B10T0-TTI, B9T1-TTI, and B8T2-TTI

**Table S2** Mechanical properties of the cross-linked PTU

| <b>Sample</b> | <b>Tensile Strength<br/>(MPa)</b> | <b>Elongation at<br/>break (%)</b> | <b>Tensile modulus<br/>(MPa)</b> |
|---------------|-----------------------------------|------------------------------------|----------------------------------|
| B10T0-THDI    | 23.7±1.4                          | 225.3±3.8                          | 17.4±1.0                         |
| B10T0-TTI     | 52.7±2.8                          | 8.7±1.6                            | 1638.9±47.3                      |
| B9T1-TTI      | 60.8±3.6                          | 7.3±1.3                            | 1826.2±59.6                      |
| B8T2-TTI      | 65.0±2.1                          | 6.2±0.9                            | 1951.4±27.8                      |

**Table S3** Thermal properties of the cross-linked PTU

| <b>Samples</b> | $T_{5\%}$<br>(°C) | $R_{800\text{ }^\circ\text{C}}$<br>(%) | $T_{dmax}$<br>(°C) | $T_g$ (°C)<br>DSC | $T_g$ (°C)<br>DMA | $E'$ at 25 °C<br>(MPa) | $\nu_e$<br>(mol/m <sup>3</sup> ) |
|----------------|-------------------|----------------------------------------|--------------------|-------------------|-------------------|------------------------|----------------------------------|
| B10T0-THDI     | 312.0             | 5.4                                    | 354.3/471          | 16.7              | 32.8              | 773                    | 825                              |
| B10T0-TTI      | 310.0             | 16.5                                   | 349.7              | 49.7              | 75.1              | 1317                   | 485                              |
| B9T1-TTI       | 294.7             | 18.3                                   | 350.3              | 55.8              | 81.5              | 1350                   | 807                              |
| B8T2-TTI       | 279.3             | 19.8                                   | 353.7              | 61.7              | 83.4              | 1368                   | 971                              |

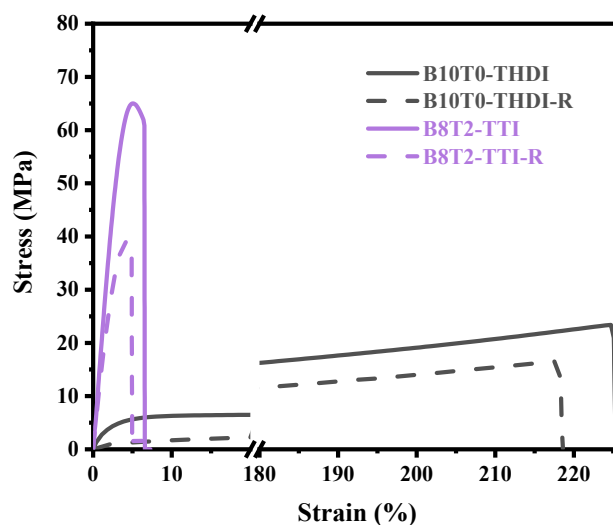

**Figure S5** Tensile stress-strain curves of original and reprocessed B10T0-THDI and B8T2-TTI

The tensile strength of the samples after repeated processing had decreased. The tensile strength of B10T0-THDI and B8T2-TTI after secondary processing maintained 70.7 % and 60.1 % of the tensile strength of the original sample. The thiocarbamate bond can be exchanged during the reprocessing process, while other covalent bonds on the main chain cannot be repaired after being destroyed, resulting in a decrease in the crosslinking density, which made the tensile strength significantly reduced. The tensile strength recovery rate of B8T2-TTI was lower than that of B10T0-THDI. This was mainly because the rigid benzene ring structure in TTI limits the movement of polymer segments, and the thiocarbamate bond was difficult to move to the interface to undergo bond exchange, making the reprocessing efficiency of B8T2-TTI lower than that of B10T0-THDI.



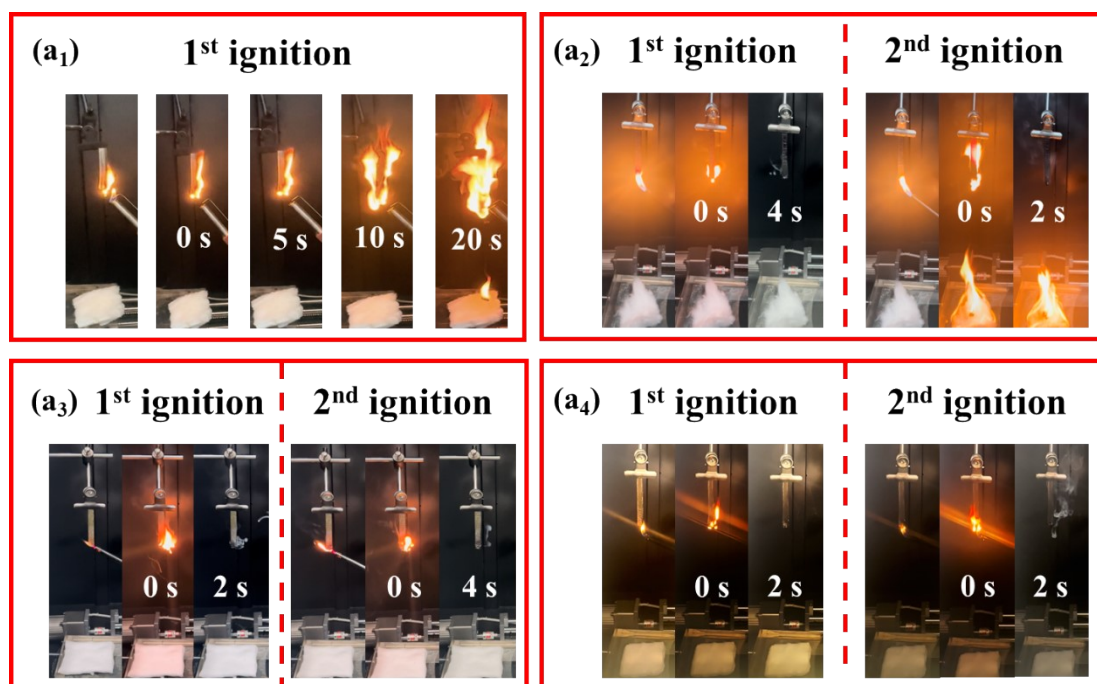

**Figure S6** Digital photographs of vertical combustion of the crosslinked PTU (a<sub>1</sub>) B10T0-THDI, (a<sub>2</sub>) B10T0-TTI, (a<sub>3</sub>) B9T1-TTI, (a<sub>4</sub>) B8T2-TTI

**Table S4** The LOI value and UL-94 rating of the crosslinked PTU

| Samples    | LOI (%) | UL-94                              |          |                 |           |
|------------|---------|------------------------------------|----------|-----------------|-----------|
|            |         | t <sub>1</sub> +t <sub>2</sub> (s) | Dripping | Cotton Ignition | Rating    |
| B10T0-THDI | 21.2    | >30                                | Yes      | Yes             | No Rating |
| B10T0-TTI  | 27.3    | 6                                  | Yes      | Yes             | V-2       |
| B9T1-TTI   | 27.8    | 6                                  | No       | No              | V-0       |
| B8T2-TTI   | 28.4    | 4                                  | No       | No              | V-0       |

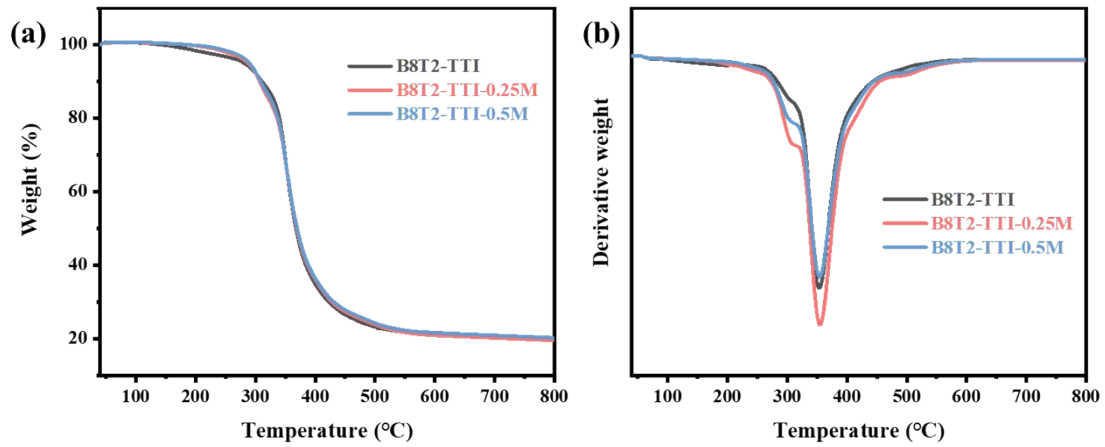

**Figure S7** (a) TGA and (b) DTG curves of PTU/MXene composites

**Table S5** Thermal and mechanical properties of the PTU/MXene composites

| Samples        | $T_{5\%}$<br>(°C) | $R_{800\text{ }^\circ\text{C}}$<br>(%) | $T_{dmax}$<br>(°C) | Tensile<br>Strength<br>(MPa) | Elongation at<br>break (%) | Tensile<br>modulus<br>(GPa) |
|----------------|-------------------|----------------------------------------|--------------------|------------------------------|----------------------------|-----------------------------|
| B8T2-TTI       | 279.3             | 19.8                                   | 353.7              | 65.0±2.1                     | 6.2±0.9                    | 1.95±0.03                   |
| B8T2-TTI-0.25M | 287.3             | 19.4                                   | 355                | 66.2±2.4                     | 4.5±0.2                    | 2.26±0.06                   |
| B8T2-TTI-0.5M  | 289.3             | 20.2                                   | 354.3              | 66.4±1.9                     | 3.7±0.1                    | 2.45±0.08                   |

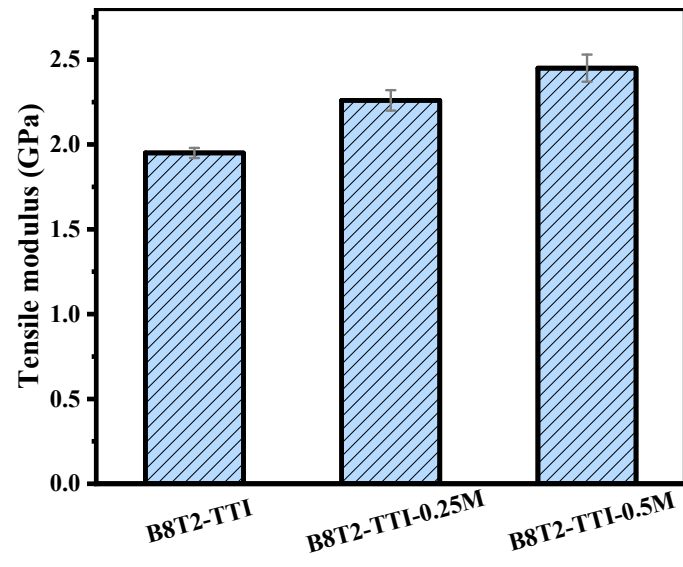

**Figure S8** Tensile modulus of the PTU/MXene composites
